# Supplementary material for: Breastfeeding Duration and Development of Dysglycemia in Women Who Had Gestational Diabetes Mellitus: Evidence from the GUSTO Cohort Study
Source: MDPI journal article supplement (doi:10.3390/nu13020408), 2021-01-28
Supplement: s1 [file s1]

**Supplement Table 1: Socio-demographic comparison between GUSTO women with a history of GDM by completion of postpartum OGTT.**

| Socio-demographic characteristics      | Complete OGTT data   | In-complete OGTT data | <i>p-value</i> |
|----------------------------------------|----------------------|-----------------------|----------------|
|                                        | <b>n=124 (61.7%)</b> | <b>n=77 (38.3%)</b>   |                |
| Maternal age at delivery, years, n (%) |                      |                       | 0.528          |
| ≤30                                    | 27 (21.8)            | 16 (25.0)             |                |
| 31-39                                  | 83 (66.9)            | 44 (68.7)             |                |
| ≥40                                    | 14 (11.3)            | 4 (6.3)               |                |
| Ethnicity, n (%)                       |                      |                       | 0.955          |
| Chinese                                | 78 (63.4)            | 48 (62.3)             |                |
| Malay                                  | 17 (13.8)            | 12 (15.6)             |                |
| Indian                                 | 28 (22.8)            | 17 (22.1)             |                |
| Education level, n (%)                 |                      |                       | 0.455          |
| Secondary or below                     | 25 (20.2)            | 20 (26.3)             |                |
| Diploma/Technical education            | 47 (37.9)            | 23 (30.3)             |                |
| University or higher                   | 52 (41.9)            | 33 (43.4)             |                |
| Household monthly income, n (%)        |                      |                       | 0.875          |
| ≤ S\$6,000                             | 78 (66.7)            | 47 (65.3)             |                |
| > S\$6,000                             | 39 (33.3)            | 25 (34.7)             |                |
| Parity at recruitment, n (%)           |                      |                       | 0.939          |
| 0                                      | 47 (37.9)            | 26 (40.6)             |                |
| 1                                      | 53 (42.7)            | 26 (40.6)             |                |
| ≥ 2                                    | 24 (19.4)            | 12 (18.7)             |                |

Abbreviations: GUSTO Growing Up in Singapore Towards healthy Outcomes; GDM gestational diabetes mellitus; OGTT oral glucose tolerance test; GCE General Certificate of Education. Categorical variables were expressed in frequencies and percentages. Women with a history of GDM in the main GUSTO cohort: 201
